# Supplementary material for: Sigma oscillations protect or reinstate motor memory depending on their temporal coordination with slow waves
Source: eLife journal article supplement (doi:10.7554/elife.73930), 2022-06-21
Supplement: supp [file elife-73930-supp-v1.zip]

Archive with 14 entries (14 files):
- elife_poa_e73930_Transparent_Reporting_File.pdf
- elife_poa_e73930_Figure_2_figure_supplement_1.pdf
- elife_poa_e73930_Figure_2_figure_supplement_2.pdf
- elife_poa_e73930_Figure_3_figure_supplement_1.pdf
- elife_poa_e73930_Figure_3_figure_supplement_2.pdf
- elife_poa_e73930_Figure_3_figure_supplement_3.pdf
- elife_poa_e73930_Figure_6_figure_supplement_1.pdf
- elife_poa_e73930_Figure_6_figure_supplement_2.pdf
- elife_poa_e73930_Figure_6_figure_supplement_3.pdf
- elife_poa_e73930_Figure_7_figure_supplement_1.pdf
- elife_poa_e73930_Figure_8_figure_supplement_1.pdf
- elife_poa_e73930_Supplementary_file_1.docx
- elife_poa_e73930_Supplementary_file_2.docx
- elife_poa_e73930_Supplementary_file_3.docx
