# Supplementary material for: Sigma oscillations protect or reinstate motor memory depending on their temporal coordination with slow waves
Source: eLife journal article supplement (doi:10.7554/elife.73930), 2022-06-21
Supplement: supp [file elife-73930-supp-v1.zip › elife_poa_e73930_Figure_6_figure_supplement_1.pdf]

a. Cue-locked preferred phase

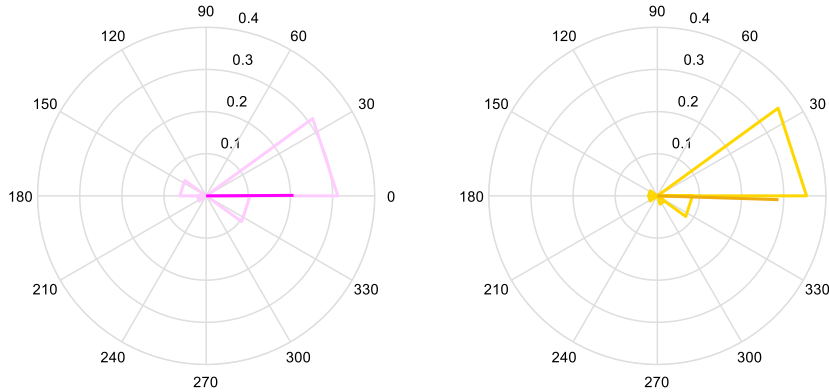

b. Sw-locked preferred phase

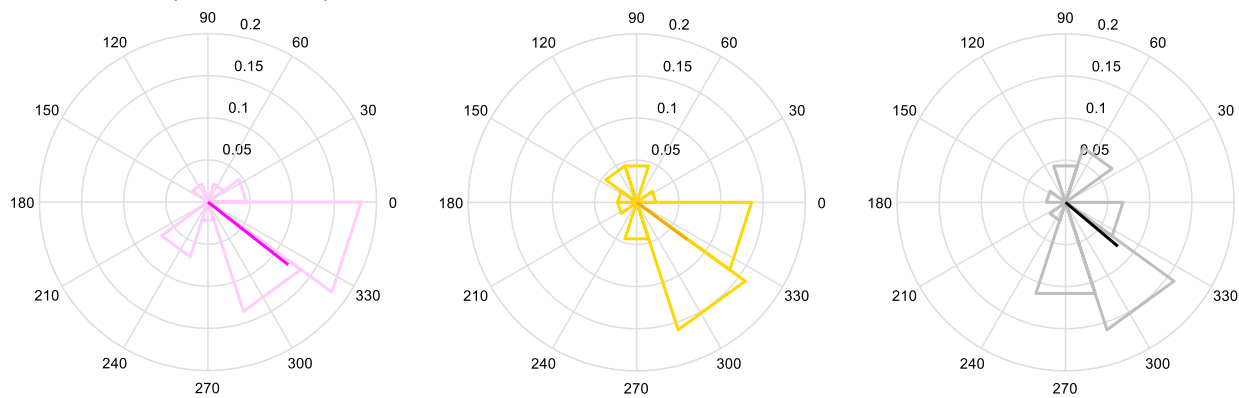

Conditions    Rest    Associated    Unassociated
