# Supplementary figures and images for: Sigma oscillations protect or reinstate motor memory depending on their temporal coordination with slow waves
Source: eLife journal article supplement (doi:10.7554/elife.73930), 2022-06-21

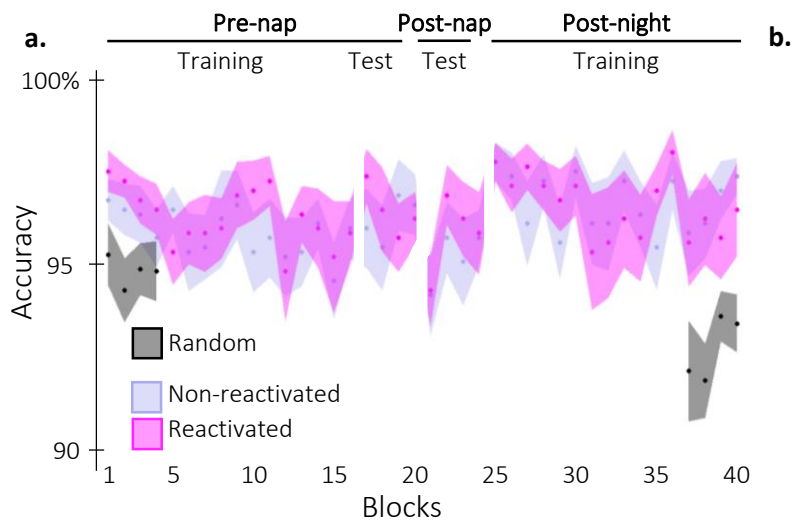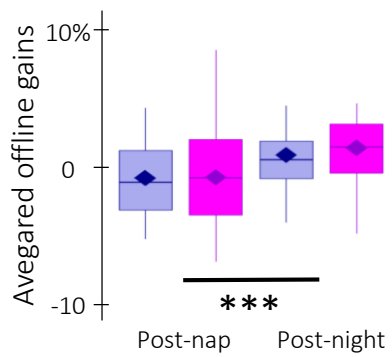

Supplement: supp [file elife-73930-supp-v1.zip › elife_poa_e73930_Figure_2_figure_supplement_1.pdf]

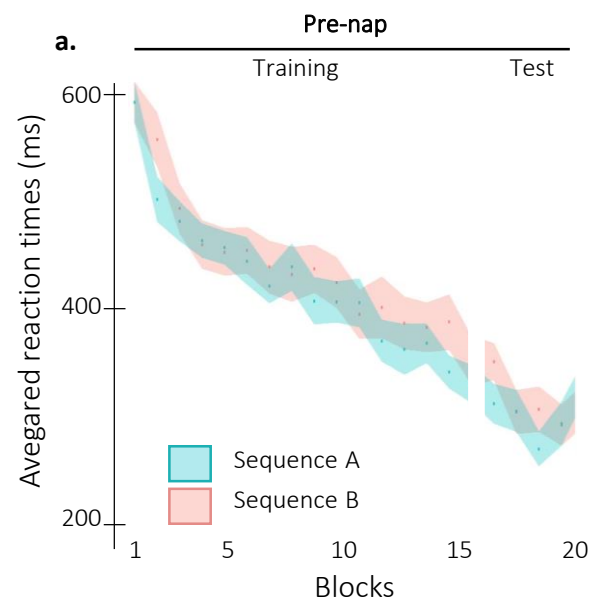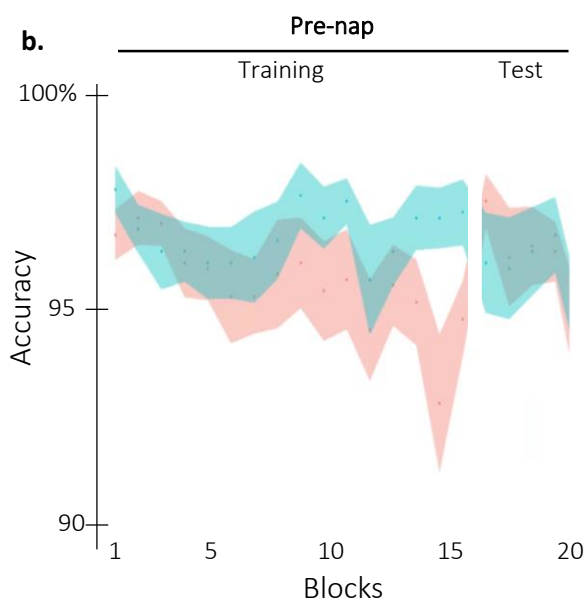

Supplement: supp [file elife-73930-supp-v1.zip › elife_poa_e73930_Figure_2_figure_supplement_2.pdf]

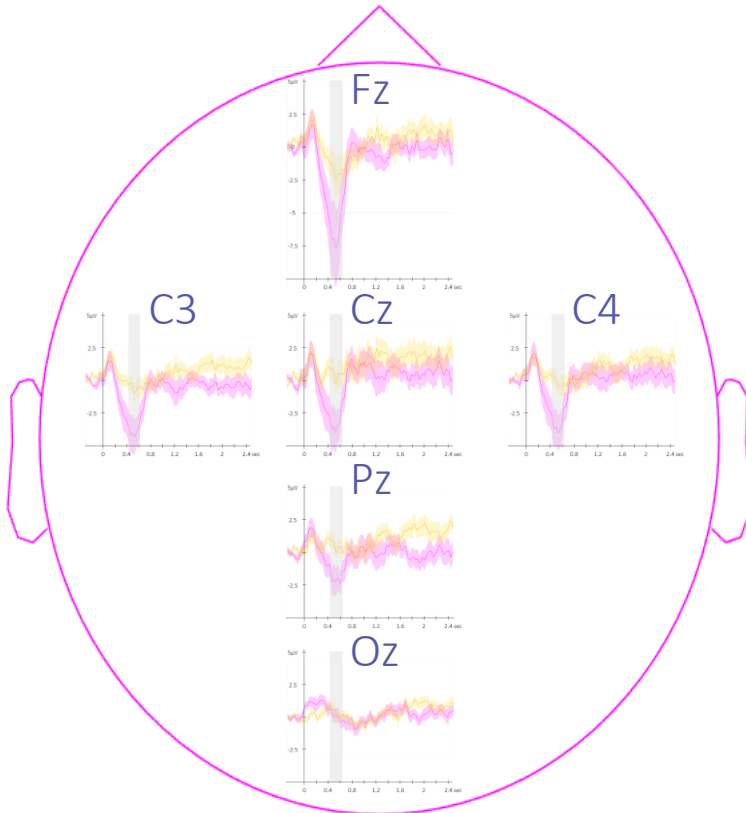

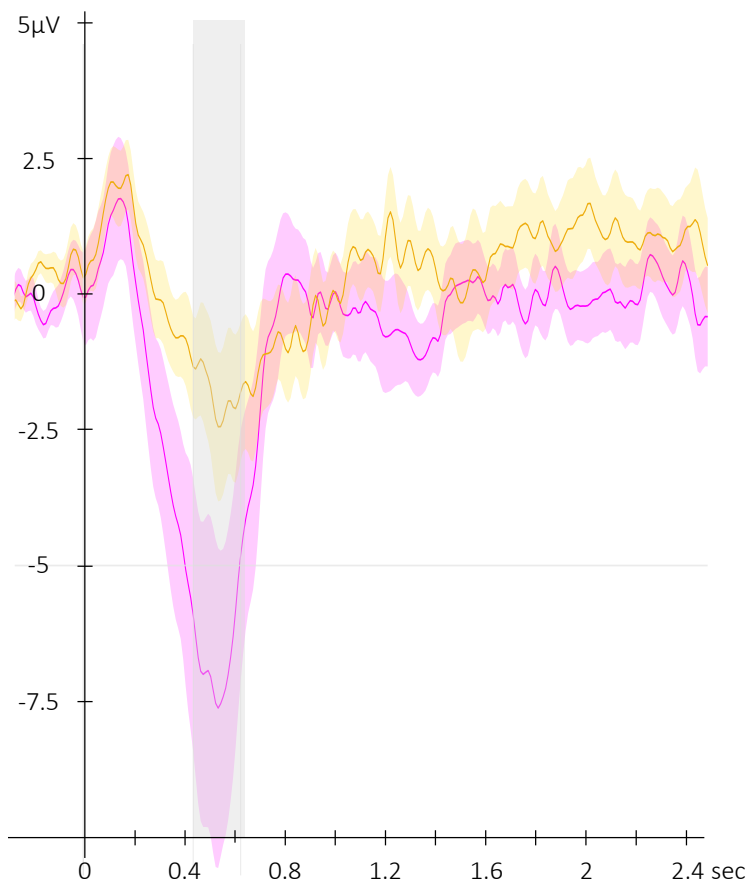

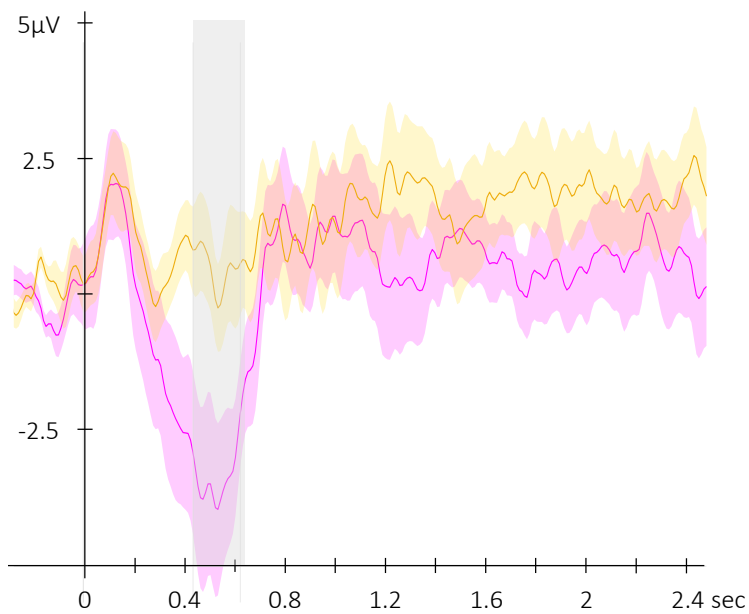

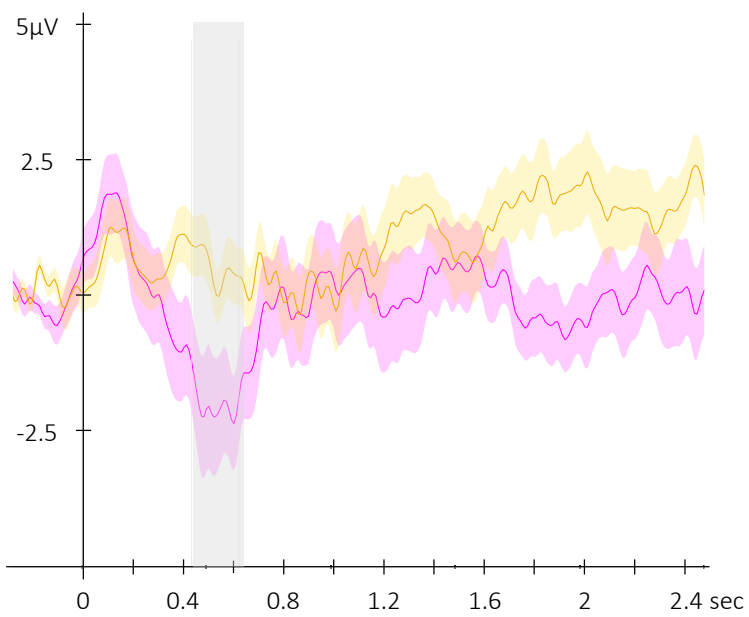

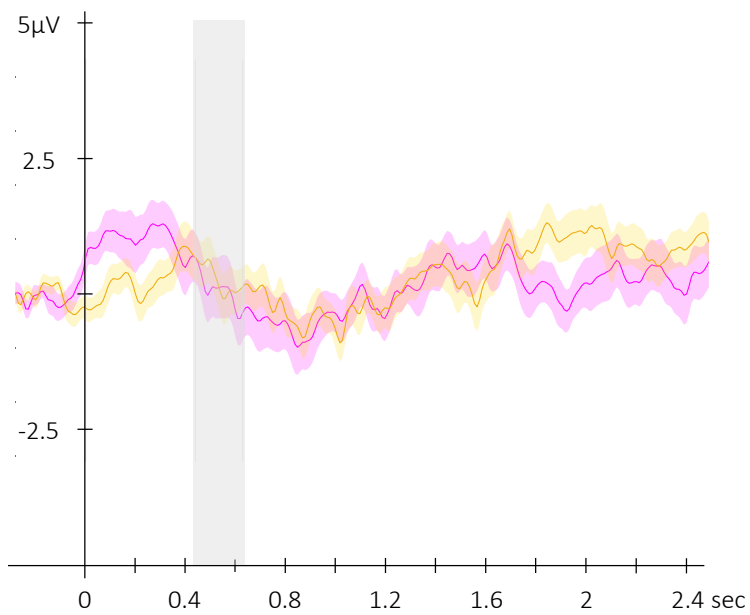

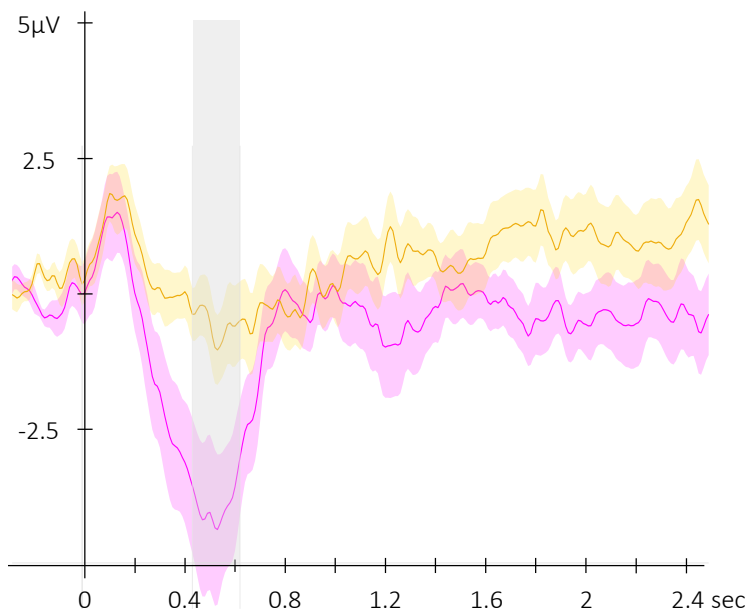

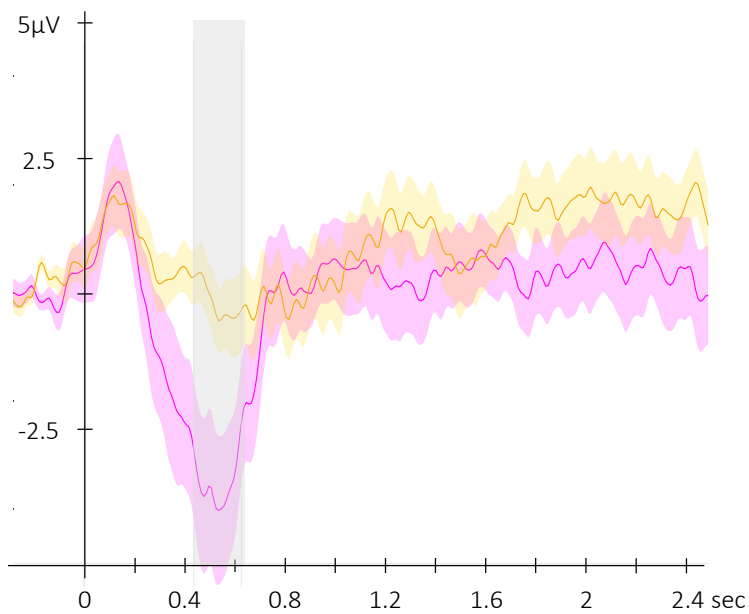

Supplement: supp [file elife-73930-supp-v1.zip › elife_poa_e73930_Figure_3_figure_supplement_1.pdf]

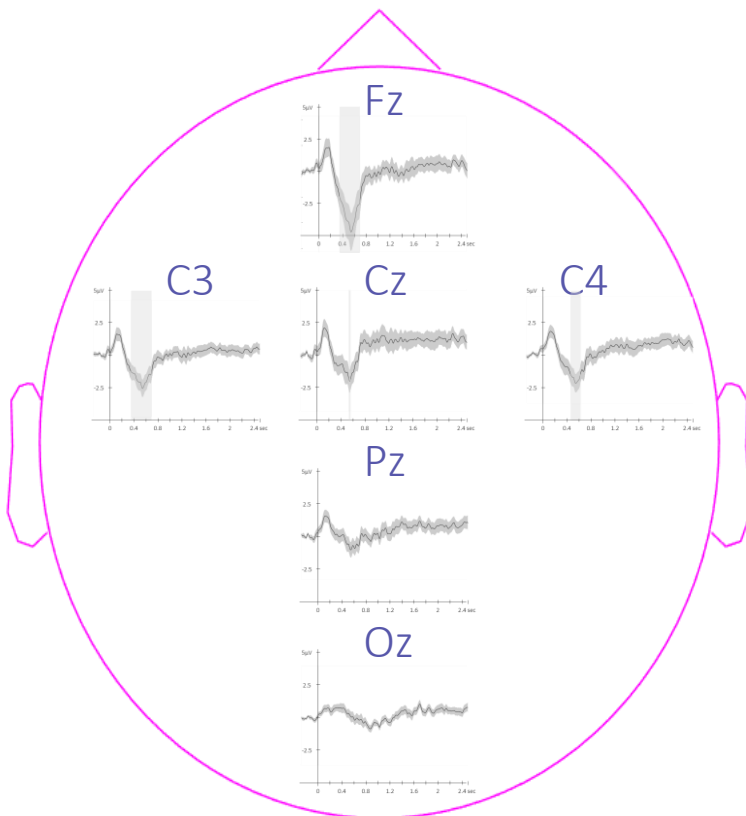

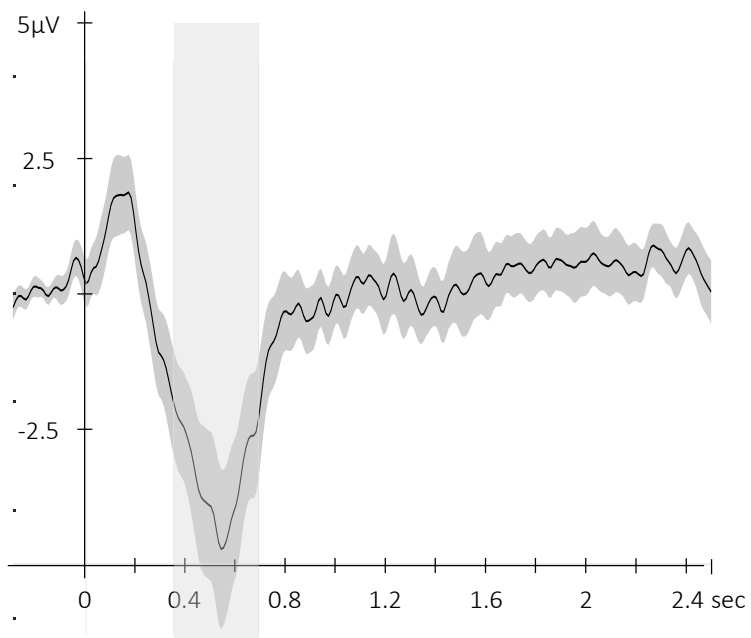

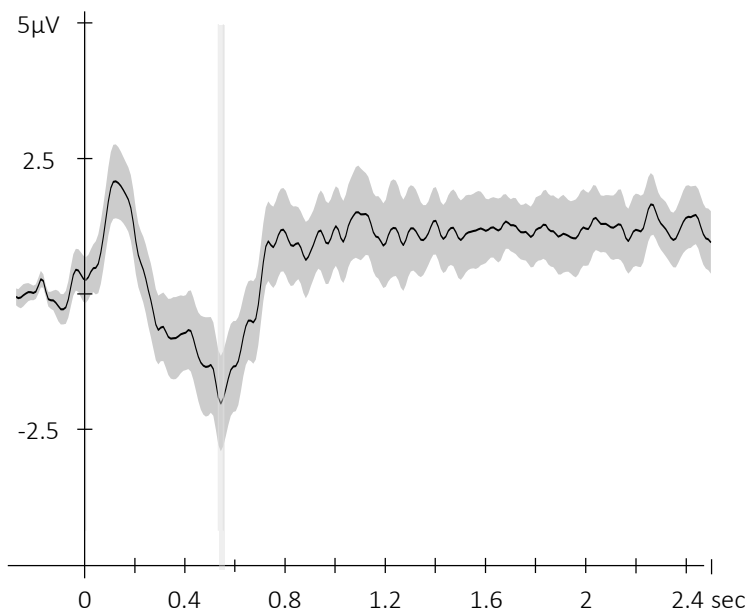

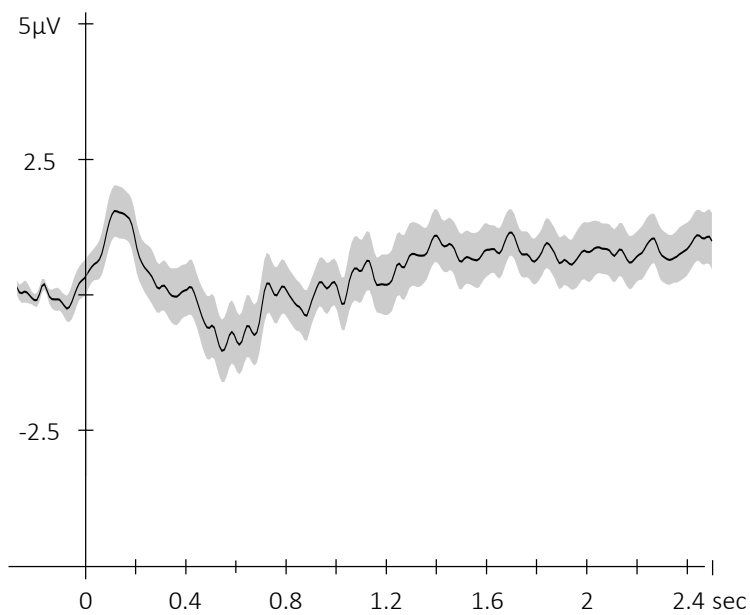

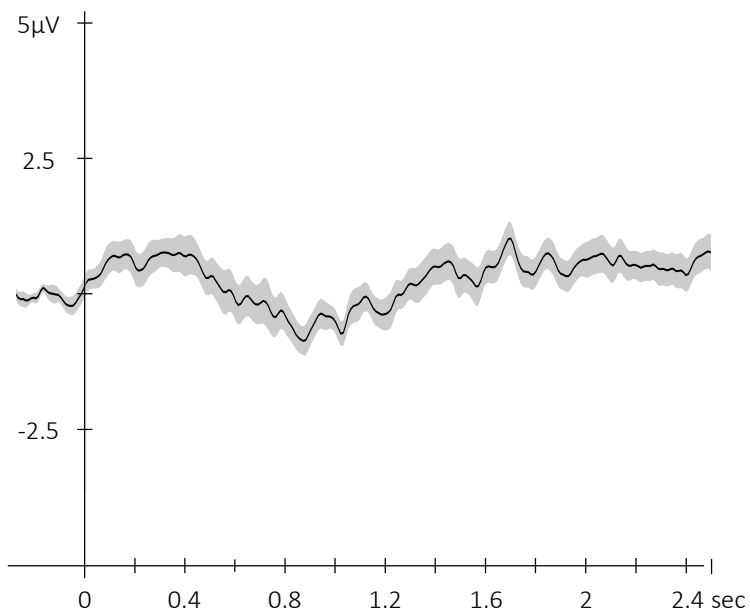

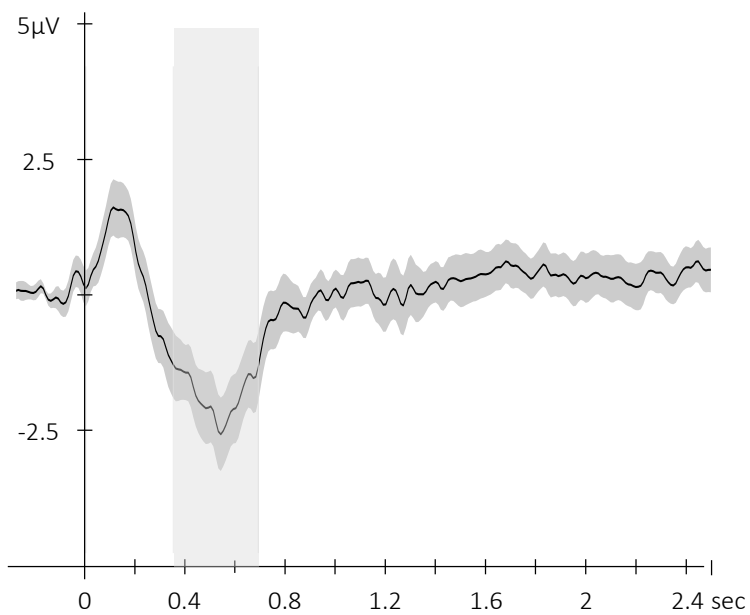

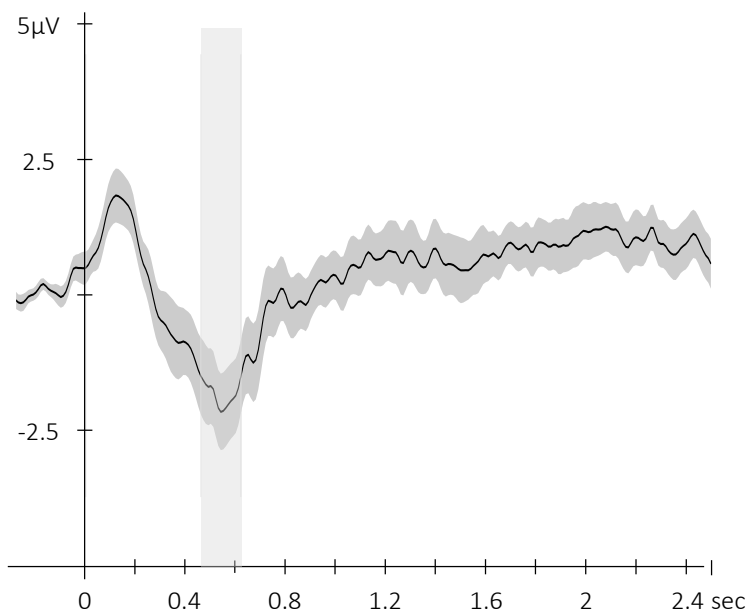

Supplement: supp [file elife-73930-supp-v1.zip › elife_poa_e73930_Figure_3_figure_supplement_3.pdf]

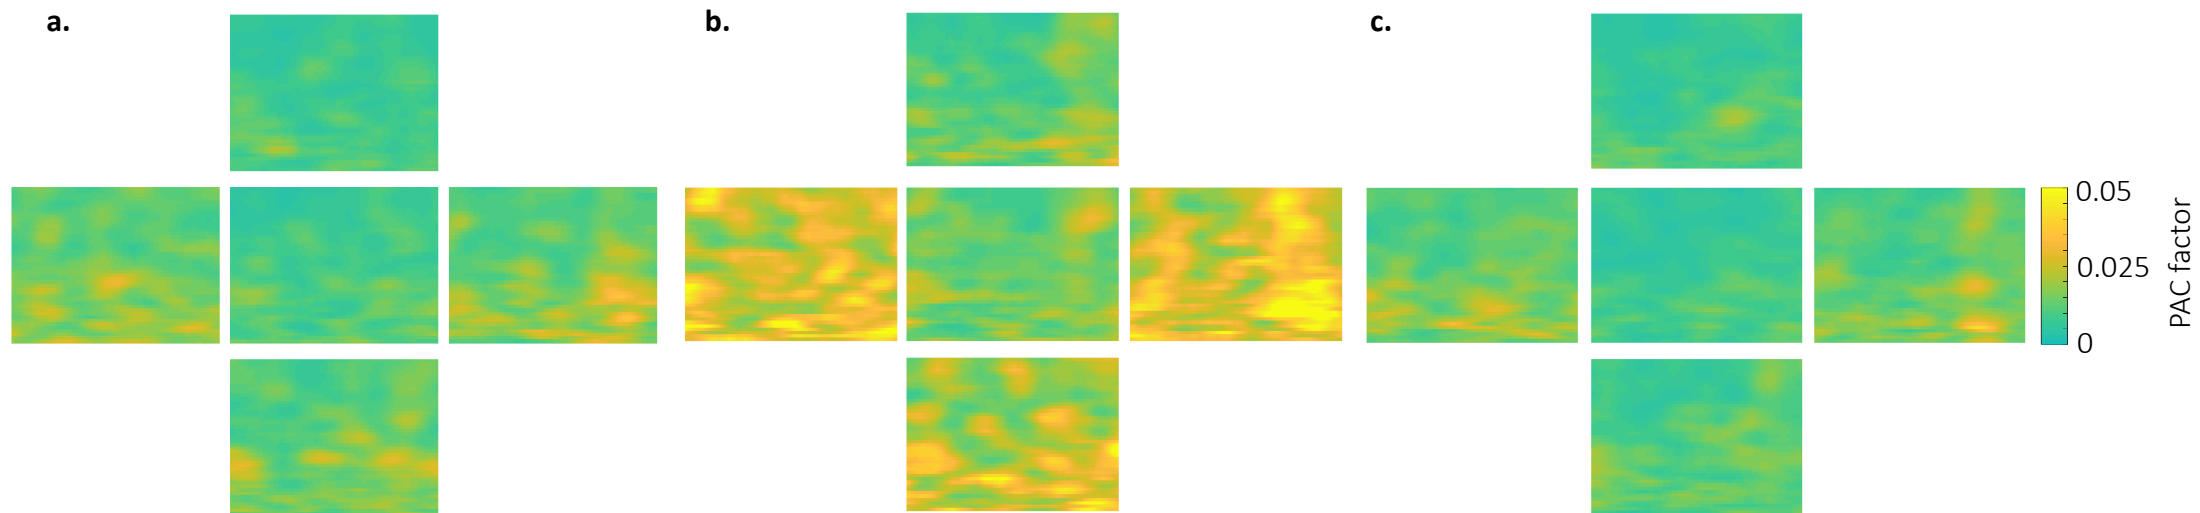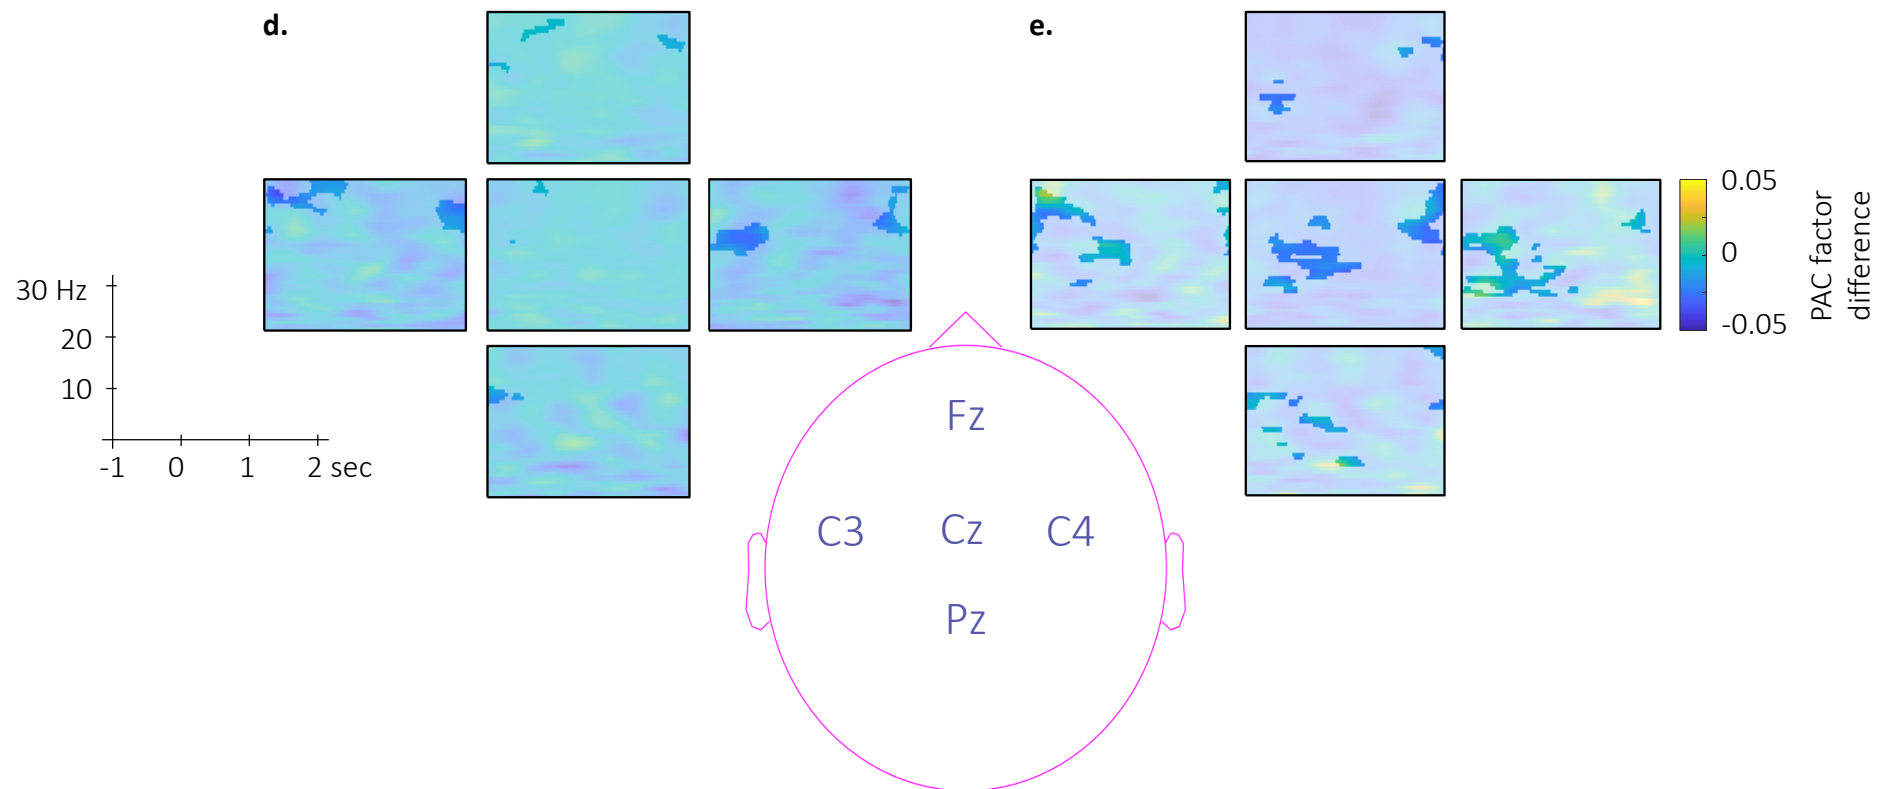

Supplement: supp [file elife-73930-supp-v1.zip › elife_poa_e73930_Figure_6_figure_supplement_2.pdf]

Correlations between PAC and SW features

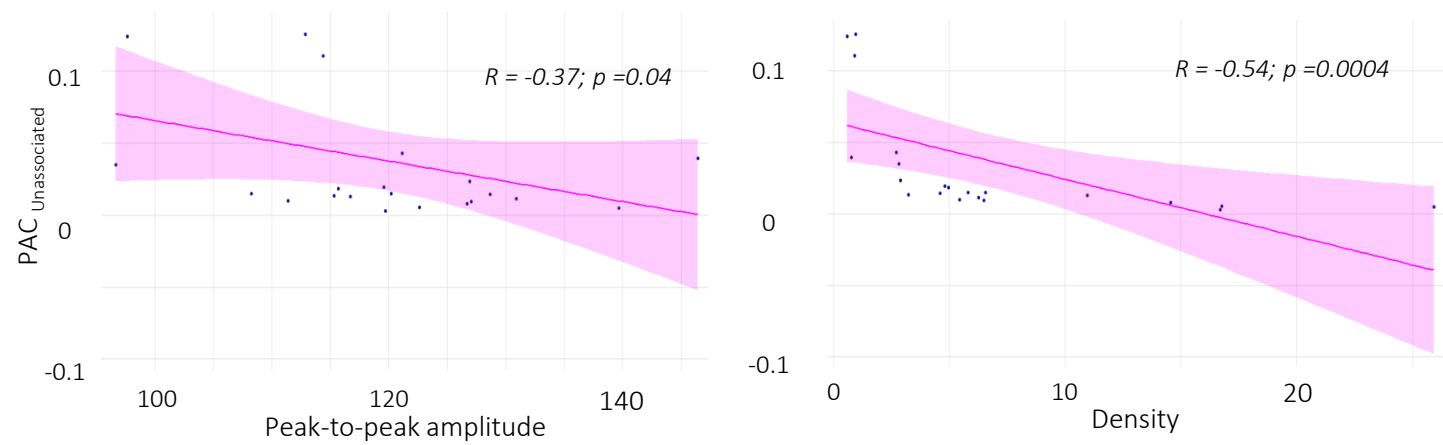

Supplement: supp [file elife-73930-supp-v1.zip › elife_poa_e73930_Figure_6_figure_supplement_3.pdf]

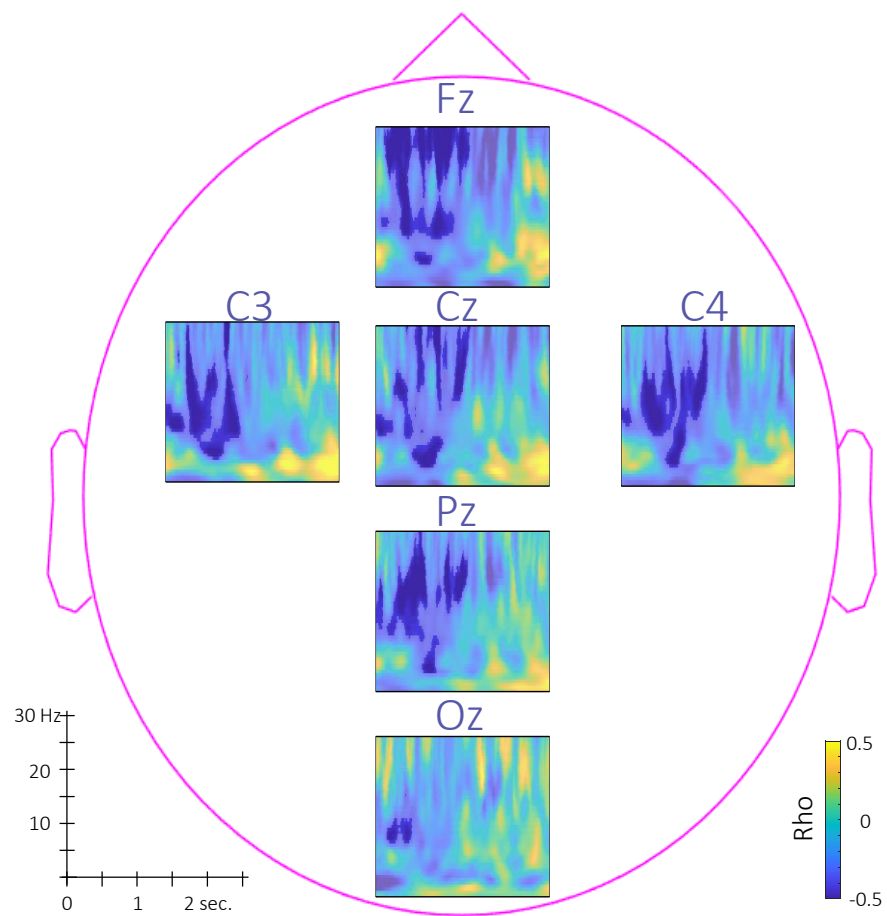

Supplement: supp [file elife-73930-supp-v1.zip › elife_poa_e73930_Figure_7_figure_supplement_1.pdf]

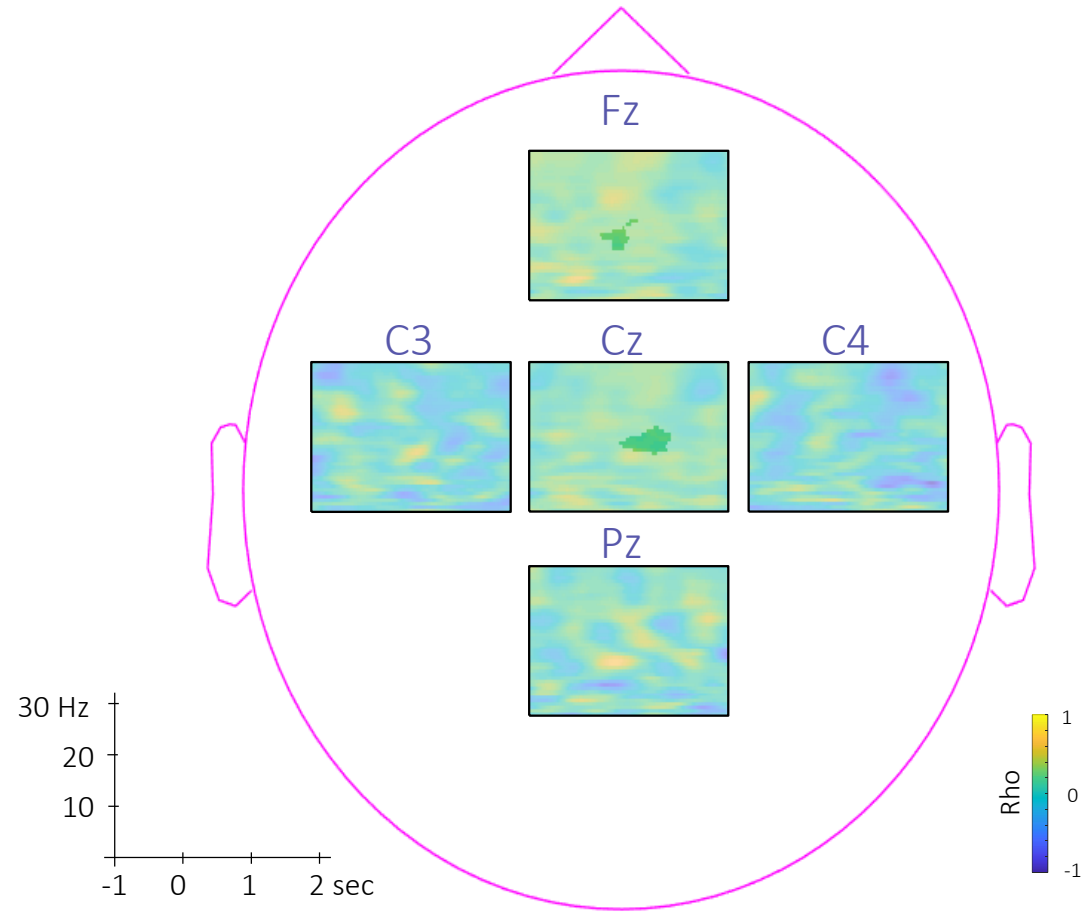

Supplement: supp [file elife-73930-supp-v1.zip › elife_poa_e73930_Figure_8_figure_supplement_1.pdf]

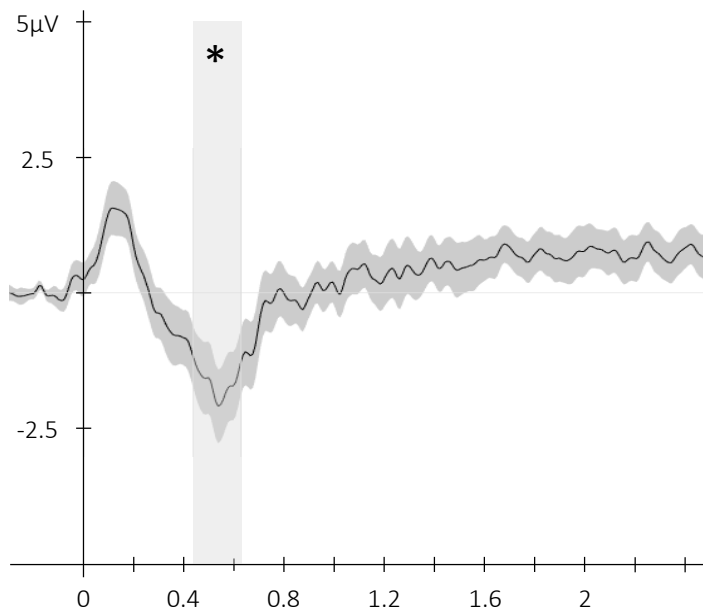

Supplement: supp [file elife_poa_e73930_Figure_3_figure_supplement_2.pdf › elife_poa_e73930_Figure_3_figure_supplement_2.pdf]
